# Supplementary material for: A chitosan/rGO/Fe3O4-modified electrode for sensitive cholesterol determination in blood serum
Source: Royal Society of Chemistry journal article supplement (doi:10.1039/d5ra09147k), 2026-05-26
Supplement: d5ra09147k1.pdf [file d5ra09147k1.pdf]

## Supplementary Information

### A Chitosan/rGO/Fe<sub>3</sub>O<sub>4</sub>-Modified Electrode for Sensitive Cholesterol

#### Determination in Blood Serum

Irwana Nainggolan,<sup>\*a,b,c</sup> Tulus Ikhsan Nasution,<sup>c,d</sup> Sake Juli Martina,<sup>e</sup> Agung

Pratama,<sup>f</sup> Bing Li,<sup>g</sup> Maya Safrina Dalimunthe,<sup>a</sup> Ardiansyah Sembiring,<sup>a,b,c,h</sup> Reka

Mustika Sari,<sup>i</sup> Khatarina Meldawati Pasaribu,<sup>j</sup> Hanip Fahri,<sup>k</sup> Rica Asrosa,<sup>d</sup>

Rozyanty Rahman,<sup>l</sup> Marlin Ramadhan Baidillah,<sup>m</sup> Susilo Sudarman,<sup>n</sup>

\*Corresponding author Tel.: +62-813-7011-6603 E-mail address: [irwana@usu.ac.id](mailto:irwana@usu.ac.id)

---

<sup>a.</sup> Department of Chemistry, Faculty of Mathematics and Natural Science, Universitas Sumatera Utara, Medan, 20155, Indonesia.

<sup>b.</sup> Center of Excellent Chitosan and Advance Materials, Universitas Sumatera Utara, 20155, Medan, Indonesia.

<sup>c.</sup> Center of Excellent for Greenhouse Gas Emission Control, Universitas Sumatera Utara, 20155, Medan, Indonesia

<sup>d.</sup> Department of Physics, Faculty of Mathematics and Natural Science, Universitas Sumatera Utara, Medan, 20155, Sumatera Utara, Indonesia.

<sup>e.</sup> Department of Pharmacology and Therapeutics, Faculty of Medicine, Universitas Sumatera Utara, Medan, Indonesia.

<sup>f.</sup> Department of Chemistry, Faculty of Vocational, Universitas Sumatera Utara, Medan, 20155, Indonesia.

<sup>g.</sup> Institute for Materials Discovery, University College London, London, WC1E 7JE, UK.

<sup>h.</sup> Postgraduate School, Department of Chemistry, Faculty of Mathematics and Natural Sciences, Universitas Sumatera Utara, Medan, 20155, Indonesia

<sup>i.</sup> Research Center for Food Technology and Processing, National Research and Innovation Agency, Gunungkidul, Yogyakarta, Indonesia.

<sup>j.</sup> Research Center for Biomass and Bioproducts, National Research and Innovation Agency of Indonesia (BRIN), Cibinong 16911, Indonesia.

<sup>k.</sup> RSUD Drs. H. Amri Tambunan, Deli Serdang 20518, Indonesia

<sup>l.</sup> School of Materials Engineering, Faculty of Chemical Engineering Technology, Universiti Malaysia Perlis, Malaysia

<sup>m.</sup> Research Center for Electronics, National Research and Innovation Agency (BRIN), KST Samaun Samadikun, Bandung, 40135, Indonesia

<sup>n.</sup> Research Center for Molecular Chemistry, National Research and Innovation Agency (BRIN), B.J. Habibie Science and Technology Area, South Tangerang, 15314, Indonesia.

Table S1. Elemental composition of the pure chitosan, CS/rGO-modified Cu-PCB electrode, CS/rGO/Fe<sub>3</sub>O<sub>4</sub>-modified C-PCB electrode with Fe<sub>3</sub>O<sub>4</sub> 75 mg/L, CS/rGO/Fe<sub>3</sub>O<sub>4</sub>-modified Cu-PCB electrode with Fe<sub>3</sub>O<sub>4</sub> 90 mg/L, CS/rGO/Fe<sub>3</sub>O<sub>4</sub>-modified Cu-PCB electrode with Fe<sub>3</sub>O<sub>4</sub> 105 mg/L, and CS/rGO/Fe<sub>3</sub>O<sub>4</sub>-modified Cu-PCB electrode with Fe<sub>3</sub>O<sub>4</sub> 120 mg/L

| No | Samples                                                                                                       | Elemental Composition (%) |      |      | Sum (%) |
|----|---------------------------------------------------------------------------------------------------------------|---------------------------|------|------|---------|
|    |                                                                                                               | C                         | O    | Fe   |         |
| 1  | Pure Chitosan                                                                                                 | 52.8                      | 47.2 | -    | 100     |
| 2  | CS/rGO-modified Cu-PCB electrode                                                                              | 76.4                      | 23.6 | -    | 100     |
| 3  | CS/rGO/Fe <sub>3</sub> O <sub>4</sub> -modified Cu-PCB electrode with Fe <sub>3</sub> O <sub>4</sub> 75 mg/L  | 48.3                      | 42.3 | 9.4  | 100     |
| 4  | CS/rGO/Fe <sub>3</sub> O <sub>4</sub> -modified Cu-PCB electrode with Fe <sub>3</sub> O <sub>4</sub> 90 mg/L  | 45.1                      | 42.3 | 12.6 | 100     |
| 5  | CS/rGO/Fe <sub>3</sub> O <sub>4</sub> -modified Cu-PCB electrode with Fe <sub>3</sub> O <sub>4</sub> 105 mg/L | 41.9                      | 42.4 | 15.7 | 100     |
| 6  | CS/rGO/Fe <sub>3</sub> O <sub>4</sub> -modified Cu-PCB electrode with Fe <sub>3</sub> O <sub>4</sub> 120 mg/L | 39.1                      | 42.6 | 18.3 | 100     |

Table S2. AFM characteristics of CS/rGO/Fe<sub>3</sub>O<sub>4</sub>-modified Cu-PCB electrode,

| Fe <sub>3</sub> O <sub>4</sub> (mg/L) | Sa (nm) | RMS (Sq, nm) | Skew (Ssk) | Excess Kurtosis (Sku) |
|---------------------------------------|---------|--------------|------------|-----------------------|
| 75                                    | 1.99    | 2.84         | 0.61       | 1.83                  |
| 90                                    | 7.64    | 12.74        | 1.24       | 2.7                   |
| 105                                   | 9.78    | 24.47        | 1.47       | 3.01                  |
| 120                                   | 24.53   | 32.72        | 3.19       | 5.6                   |

Table S3. Reproducibility performance of the developed electrode

| Electrode | <i>I</i> <sub>pa</sub> (A) | <i>I</i> <sub>pc</sub> (A) | <i>E</i> <sub>pa</sub> (V) | <i>E</i> <sub>pc</sub> (V) | $\Delta E_p$ |
|-----------|----------------------------|----------------------------|----------------------------|----------------------------|--------------|
| 1         | 0.000522                   | -0.000476                  | 0.24                       | 0.11                       | 0.13         |
| 2         | 0.000516                   | -0.000469                  | 0.24                       | 0.11                       | 0.13         |
| 3         | 0.000524                   | -0.000500                  | 0.24                       | 0.11                       | 0.13         |
| 4         | 0.000520                   | -0.000474                  | 0.24                       | 0.11                       | 0.13         |
| 5         | 0.000520                   | -0.000472                  | 0.24                       | 0.11                       | 0.13         |

Table S4. Long-term stability performance of the developed electrode

| Day | <i>I</i> <sub>pa</sub> (A) | Retention (%) |
|-----|----------------------------|---------------|
| 0   | 0.000522                   | 100           |
| 7   | 0.000505                   | 96.7          |
| 14  | 0.000492                   | 94.3          |
| 21  | 0.000478                   | 91.6          |
| 28  | 0.000460                   | 88.1          |

Table S5. Selectivity performance of the developed electrode

| Sample             | $I_{pa}$ (A) | $I_{pc}$ (A) | $E_{pa}$ (V) | $E_{pc}$ (V) | $\Delta E_p$ |
|--------------------|--------------|--------------|--------------|--------------|--------------|
| Ch                 | 0,000522     | -0,000476    | 0,24         | 0,11         | 0,13         |
| Ch + Glu           | 0,000515     | -0,000468    | 0,24         | 0,11         | 0,13         |
| Ch + Tri           | 0,000508     | -0,000462    | 0,25         | 0,11         | 0,14         |
| Ch + UA            | 0,000512     | -0,000465    | 0,24         | 0,1          | 0,14         |
| Ch + Urea          | 0,000550     | -0,000459    | 0,25         | 0,1          | 0,15         |
| Ch + All (mixture) | 0,000496     | -0,000450    | 0,25         | 0,1          | 0,15         |

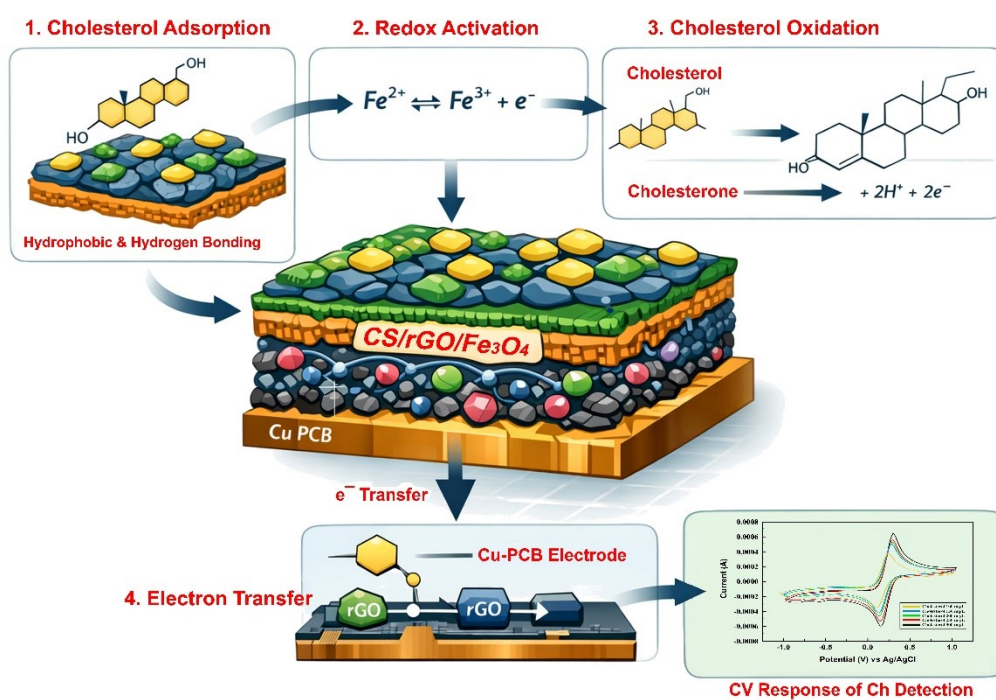

Fig. S1 The schematic representation of reaction mechanism of cholesterol detection using CS/rGO/Fe<sub>3</sub>O<sub>4</sub>-modified Cu-PCB electrode
